# Supplementary material for: Carnosine induces intestinal cells to secrete exosomes that activate neuronal cells
Source: PubMed Central journal article supplement (PMC6538158; doi:10.1371/journal.pone.0217394), 2019-05-28
Supplement: pone.0217394.s005.pdf [file pone.0217394.s005.pdf]

S1 Table Sequence primers

| Target        | Sequence                                                      |
|---------------|---------------------------------------------------------------|
| GAPDH mRNA    | 5'-CGTGGAAGGACTCATGAC-3'<br>5'-CAATTCGTTGTCATACCAG-3'         |
| Nestin mRNA   | 5'-GAGAGGGAGGACAAAGTCCC-3'<br>5'-TCCCTCAGAGACTAGCGCAT-3'      |
| Vimentin mRNA | 5'-GTTTCCAAGCCTGACCTCAC-3'<br>5'-GCTTCAACGGCAAAGTTCTC-3'      |
| NEFM mRNA     | 5'-AGACATCCACCGGCTCAAGG-3'<br>5'-CGACGCCTCCTCGATGTCTT-3'      |
| ATXN1 mRNA    | 5'-AGATATGGGTGAGGAAGCAGAGC-3'<br>5'-CAGTCTGTTGAGCTGCTTGTGG-3' |
| SLITRK5 mRNA  | 5'-TCGGTGCCCTTGTCTGTGTT-3'<br>5'-TCGGAGTTGTTGGTGCTGGT-3'      |
| ATCAY mRNA    | 5'-GTCAGCAGCCCATCCTTCCA-3'<br>5'-CGACGTCTTAACATCACGACCG-3'    |
| SNCAIP mRNA   | 5'-ACAACACCAGACTGCCAGCT-3'<br>5'-TTCTTCTGGGCCTTGGGAGC-3'      |
