# Supplementary material for: Carnosine induces intestinal cells to secrete exosomes that activate neuronal cells
Source: PubMed Central journal article supplement (PMC6538158; doi:10.1371/journal.pone.0217394), 2019-05-28
Supplement: pone.0217394.s006.pdf [file pone.0217394.s006.pdf]

**S2 Table Functional annotation cluster of target genes of miRNA  
with altered expression in response to carnosine treatment**

| <b>miRNA</b>    | <b>Functional annotation cluster of target gene</b> | <b>miRNA</b>     | <b>Functional annotation cluster of target gene</b> |
|-----------------|-----------------------------------------------------|------------------|-----------------------------------------------------|
| has-miR-24-3p   | neurotrophin TRK receptor signaling pathway         | has-miR-4281     | neurotrophin signaling pathway                      |
| has-miR-26-5p   | axon guidance                                       | has-miR-4487     | axon guidance                                       |
|                 | postsynaptic density                                | has-miR-4507     | neural tube development                             |
|                 | neuron differentiation                              |                  | neurotrophin signaling pathway                      |
|                 | neuron projection development                       |                  | regulation of neuron differentiation                |
|                 | axon guidance                                       |                  | neurotrophin signaling pathway                      |
| has-miR-92b-5p  | neurotrophin signaling pathway                      | has-miR-4532     | axon guidance                                       |
|                 | neuron differentiation                              |                  | neuron differentiation                              |
|                 | neuron development                                  |                  | neuron development                                  |
|                 | neuron projection morphogenesis                     |                  | postsynaptic density                                |
|                 | axon guidance                                       |                  | axonogenesis                                        |
| has-miR-103a-3p | neurotrophin signaling pathway                      | has-miR-4668-5p  | neural tube foration                                |
|                 | neuron development                                  |                  | astrocyte development                               |
|                 | neuron projection                                   |                  | regulation of neurogenesis                          |
|                 | axonogenesis                                        |                  | regulation of neuron differentiation                |
| has-miR-194-5p  | axon cargo transport                                | has-miR-4674     | neurotrophin signaling pathway                      |
|                 | neurogenesis                                        | has-miR-4741     | axon guidance                                       |
|                 | axon guidance                                       |                  | neurotrophin signaling pathway                      |
|                 | neural tube development                             | has-miR-6769b-5p | neural tube development                             |
|                 | neuron projection                                   |                  | axon guidance                                       |
| has-miR-320b    | neuron projection                                   |                  | regulation of nervous system development            |
|                 | neurotrophin signaling pathway                      |                  | regulation of neuron differentiation                |
|                 | neuron projection morphogenesis                     |                  | neurotrophin signaling pathway                      |
|                 | axon guidance                                       | has-miR-6732-5p  | neuron projection                                   |
| has-miR-937-5p  | axonogenesis                                        |                  | primary neural tube formation                       |
|                 | neuron projection morphogenesis                     |                  | neuron differentiation                              |
|                 | neuron development                                  |                  | neuron projection morphogenesis                     |
| has-miR-1207-5p | neural tube development                             |                  | neurotransmitter transport                          |
|                 | neurotrophin signaling pathway                      |                  | axon guidance                                       |
| has-miR-1227-5p | regulation of neuron projection development         |                  | neurotrophin signaling pathway                      |
|                 | regulation of axonogenesis                          | has-miR-6771-5p  | axonogenesis                                        |
|                 | regulation of nervous system development            | has-miR-6775-5p  | neuron differentiation                              |
|                 | neurotrophin signaling pathway                      |                  | neuron projection morphogenesis                     |
| has-miR-1343-5p | neurotrophin signaling pathway                      |                  | axonogenesis                                        |
| has-miR-3141    | central nervous system neuron differention          |                  | regulation of neurotransmitter levels               |
|                 | regulation of axonogenesis                          | has-miR-6794-5p  | axon guidance                                       |
|                 | Alzheimer's disease                                 |                  | neurotrophin signaling pathway                      |
| has-miR-3162-5p | postsynaptic density                                | has-miR-6798-5p  | axon guidance                                       |
|                 | neuron projection development                       | has-miR-6821-5p  | regulation of neuron differentiation                |
|                 | neuron differentiation                              |                  | regulation of nervous system development            |
|                 | neuron projection morphogenesis                     |                  | neurotransmitter transport                          |
|                 | axonogenesis                                        |                  | neuron apoptosis                                    |
|                 | synaptic transmission                               | has-miR-8075     | primary neural tube formation                       |
|                 | neurotrophin signaling pathway                      |                  |                                                     |
